# Supplementary material for: Whey protein isolate/gum arabic intramolecular soluble complexes improving the physical and oxidative stabilities of conjugated linoleic acid emulsions
Source: Royal Society of Chemistry journal article supplement (doi:10.1039/c5ra26040j), 2016-01-01
Supplement: c5ra26040j1.pdf [file c5ra26040j1.pdf]

## Supporting Information

2    Whey protein isolate/gum arabic intramolecular soluble complexes  
      improving the physical and oxidative stabilities of conjugated  
4                                    linoleic acid emulsions

Xiaolin Yao <sup>a, b</sup>, Shengping Xiang <sup>a</sup>, Ke Nie <sup>a</sup>, Zhiming Gao <sup>a, b</sup>, Weiqi Zhang <sup>a</sup>, Yapeng Fang <sup>a, b, \*</sup>,  
6 Katsuyoshi Nishinari <sup>a, b</sup>, Glyn O. Phillips <sup>a</sup>, Fatang Jiang <sup>a</sup>

<sup>a</sup> Glyn O. Phillips Hydrocolloid Research Centre, School of Food and Pharmaceutical Engineering,  
8 Faculty of Light Industry, Hubei University of Technology, Wuhan 430068, China.

<sup>b</sup> Hubei Collaborative Innovation Centre for Industrial Fermentation, Hubei University of Technology,  
10 Wuhan 430068, China.

\* To whom correspondence should be addressed. Tel: +86 (0) 27-88015996; Fax: +86 (0)27-88015996;  
12 Email: fangypphrc@163.com.

14

16

18

## 20 Structural transition induced by in situ acidification

The change of pH with time during GDL acidification can be monitored by pH meter. The change of  
22 turbidity and light scattering with time during GDL acidification can be monitored by UV/Vis and  
dynamic light scattering, respectively. Correlation of data at the same time point resulted in the  
24 turbidity-pH and light scattering-pH curves (Figure S1). This has been described clearly in a previous  
publication.<sup>1,2</sup>

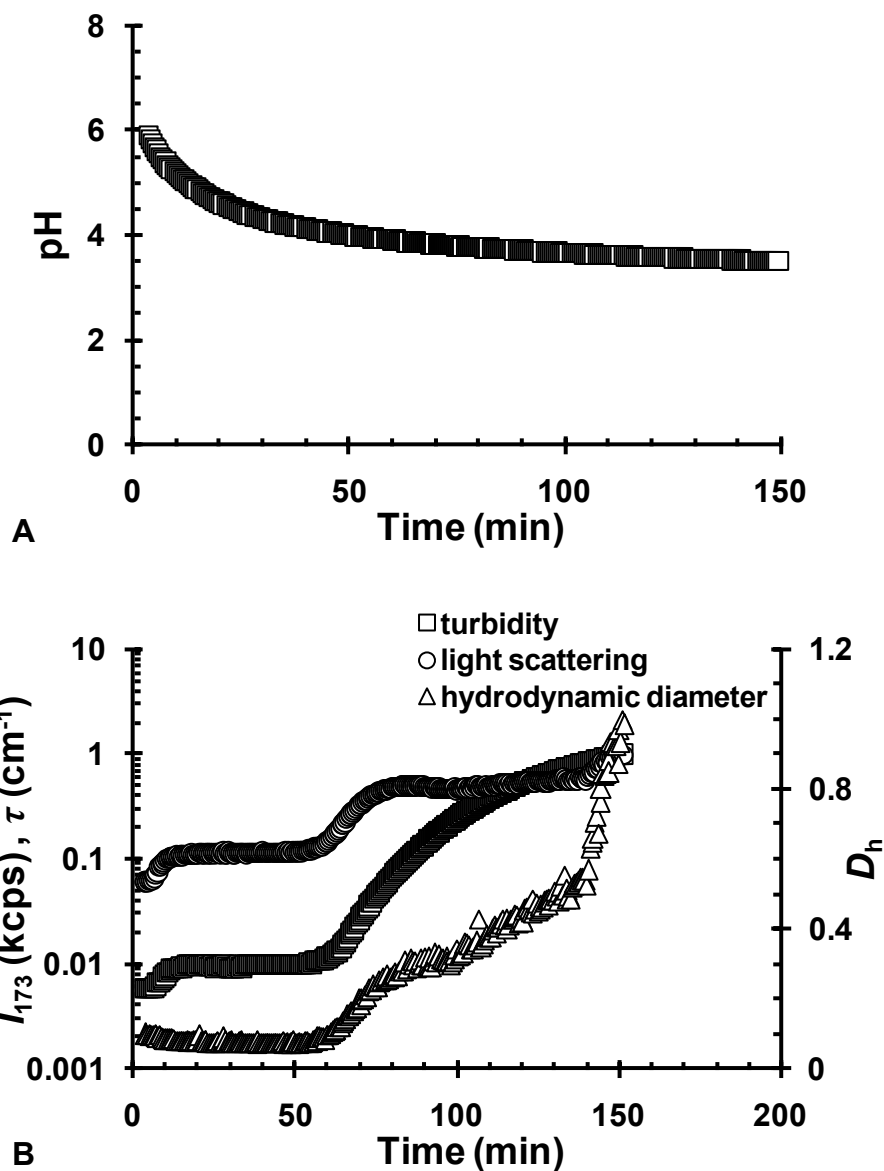

26

28 **Figure S1** Change of pH with time during GDL-induced acidification for a 0.3wt% WPI/GA mixture at  
 $r = 0.5$  with 10mM NaCl (A). Evolution of the turbidity at 500 nm ( $\tau$ ,  $\square$ ), scattered light intensity at  
30  $173^\circ$  ( $I_{173}$ ,  $\circ$ ), and hydrodynamic diameter ( $D_h$ ,  $\triangle$ ) as a function of time during GDL-induced  
acidification in the same system (B).

## 32 Nano-sized range of ISCs complexes

ISCs represented a rather stable state of the electrostatic complexation of WPI/GA, and  $D_h$  attains a  
34 nearly constant value of  $\sim 50$  nm within this specific pH range (4.0-5.4). The change of  $D_h$  for ISCs  
during GDL acidification for a 0.3wt% WPI/GA mixture at  $r = 0.5$  with 10mM NaCl is shown in Figure  
36 S2.

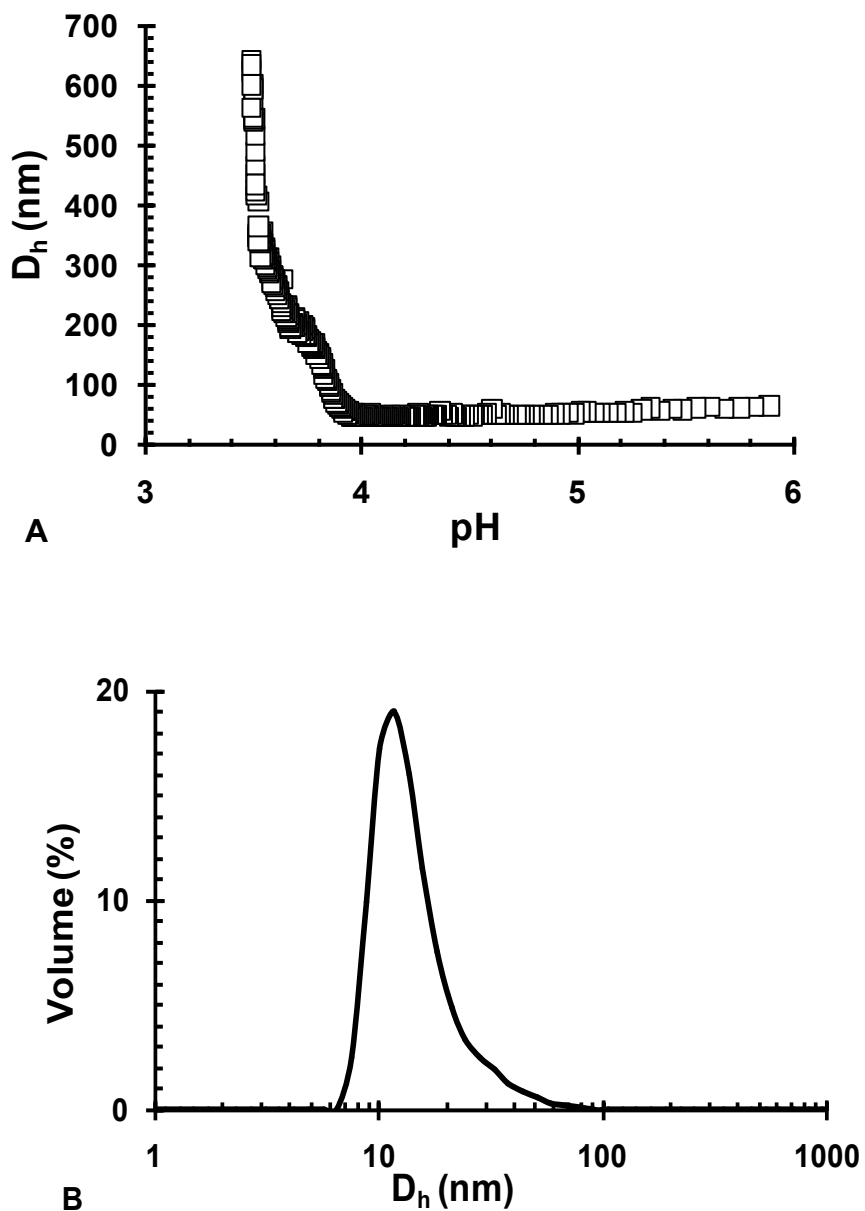

38

**Figure S2** Evolution of hydrodynamic diameter ( $D_h$ ) as a function of pH during GDL-induced  
40 acidification for a 0.3wt% WPI/GA mixture at  $r = 0.5$  with 10mM NaCl (A). The particle size  
distribution of ISCs is given at pH 4.4 (B).

42

## References

44 1 G. Mekhloufi, C. Sanchez, D. Renard, S. Guillemin and J. Hardy, *Langmuir*, 2004, 21, 386-394.

2 X. Li, Y. Fang, S. Al-Assaf, G. O. Phillips, X. Yao, Y. Zhang, M. Zhao, K. Zhang and F. Jiang,  
46 *Langmuir*, 2012, 28, 10164-10176.
